# Supplementary material for: The Influence of Age, Sex and Season on Andean Condor Ranging Behavior during the Immature Stage
Source: MDPI journal article supplement (doi:10.3390/ani13071234), 2023-04-02

## Supplementary Material for

### Influence of age, sex and season on Andean condor ranging behavior during the immature stage

Jorgelina María Guido<sup>1,2\*</sup>; Nicolás Rodolfo Cecchetto<sup>3</sup>; Pablo Ignacio Plaza<sup>1</sup>; José Antonio Donázar<sup>4</sup> and Sergio Agustín Lambertucci<sup>1</sup>

**Supplementary Table S1:** Details of tagged immature Andean condors. Reported for each bird: ID, device used, capture date and the date of the last connection of the device.

| ID       | Device                            | Capture date | Last connection |
|----------|-----------------------------------|--------------|-----------------|
| BLANCA   | CTT <sup>®</sup> -1000-BT3-Series | 13/01/2018   | 15/11/2020      |
| BM27B3_a | NT-VKT                            | 18/12/2013   | 15/01/2014      |
| BM27B3_b | NT-VKT                            | 14/11/2014   | 06/07/2016      |
| BPAZIT   | NT-VKT                            | 26/10/2013   | 03/12/2013      |
| CHITA    | CTT <sup>®</sup> -1000-BT3-Series | 13/01/2018   | 18/11/2020      |
| CT4072   | CTT <sup>®</sup> -1090            | 06/12/2011   | 15/03/2016      |
| CT8654   | CTT <sup>®</sup> -1090            | 26/10/2014   | 02/01/2014      |
| CT9058   | CTT <sup>®</sup> -1090            | 19/01/2014   | 16/03/2014      |
| CT9563   | CTT <sup>®</sup> -1090            | 04/11/2013   | 06/06/2015      |
| DCJ0MT   | NT-VKT                            | 26/10/2013   | 07/04/2016      |
| HECTOR   | CTT <sup>®</sup> -1000-BT3-Series | 13/01/2018   | 13/11/2020      |
| IHWEY8   | NT-VKT                            | 04/11/2013   | 02/01/2014      |
| JA5W9H   | NT-VKT                            | 18/12/2013   | 30/12/2013      |
| N6M1M6   | NT-VKT                            | 02/11/2013   | 20/04/2014      |
| NT113CZS | NT-VKT                            | 26/10/2013   | 13/11/2013      |
| NT12VG3Y | NT-VKT                            | 18/12/2013   | 19/01/2014      |
| O4WOMJ   | NT-VKT                            | 02/11/2013   | 14/01/2017      |
| PEPO     | CTT <sup>®</sup> -1000-BT3-Series | 25/01/2018   | 08/11/2020      |
| RK2GX6   | NT-VKT                            | 02/11/2013   | 04/12/2013      |
| TOTO     | CTT <sup>®</sup> -1000-BT3-Series | 27/01/2018   | 06/12/2020      |
| TP1PYG   | NT-VKT                            | 18/12/2013   | 08/01/2014      |
| TWFXZJ   | NT-VKT                            | 02/11/2013   | 16/01/2014      |
| U0MLYR   | NT-VKT                            | 29/10/2013   | 17/12/2015      |
| VFE3F9   | NT-VKT                            | 29/10/2013   | 05/11/2013      |
| VHE95O   | NT-VKT                            | 29/10/2013   | 03/11/2013      |
| VHSRLQ   | NT-VKT                            | 19/11/2014   | 04/12/2014      |

**Supplementary Table S2:** Description of natural history information and movement parameters of each immature condor tagged with GPS devices. For each individual we report the ID, sex, age, total number of sampled months (N° total month) and total number of GPS locations for the total months (N° total locs.). In addition, we report the number of months that reached more than 140 locations per month (Months + 140 locs.) and were used in the home range analyses, and their respective number of GPS locations to those are reported (N° locs. (month +140 locs.)). Moreover, the home range areas of the maximum flight distances of each marked immature Andean Condor are reported. The MCP of 100%, the KDE of 99%, 95% and 50% of the contour area are reported, as well as the maximum distance between two successive locations separated by a time interval of one hour (Max. dist. x hr), and the maximum distance flown in one day (Max. daily dist.), as well as the total latitudinal (North-South) and longitudinal (West - East) distance flown. In grey, the individuals that did not reach the minimum values of GPS locations necessary to be considered in the statistical analyses.

| ID       | Sex | Age    | N°<br>total<br>month | N°<br>total<br>locs. | Month<br>+ 140<br>locs. | N° locs<br>(month<br>+140<br>locs) | MCP<br>(km <sup>2</sup> ) | KDE<br>99%<br>(km <sup>2</sup> ) | KDE<br>95%<br>(km <sup>2</sup> ) | KDE<br>50%<br>(km <sup>2</sup> ) | Max.<br>dist. x<br>hr<br>(km) | Max.<br>daily<br>dist.<br>(km) | Total<br>lat.<br>dist.<br>(km) | Total<br>long.<br>dist.<br>(km) |
|----------|-----|--------|----------------------|----------------------|-------------------------|------------------------------------|---------------------------|----------------------------------|----------------------------------|----------------------------------|-------------------------------|--------------------------------|--------------------------------|---------------------------------|
| BLANCA   | F   | SA     | 35                   | 6012                 | 16                      | 4855                               | 91,445.8                  | 63,136.6                         | 43,154.3                         | 6500.2                           | 94.6                          | 238.5                          | 636.6                          | 214.0                           |
| BM27B3_a | M   | SA     | 2                    | 284                  | 1                       | 148                                | 15,416.4                  | 18,021.4                         | 12,957.6                         | 2714.1                           | 48.2                          |                                | 299.4                          | 75.0                            |
| BM27B3_b | F   | JUV/SA | 22                   | 2950                 | 8                       | 1835                               | 102,073.9                 | 82,475.5                         | 58,703.3                         | 10,749.9                         | 58.4                          | 139.2                          | 811.9                          | 177.0                           |
| BPAZIT   | H   | SA     | 3                    | 230                  | 1                       | 186                                | 21,151.3                  | 21,212.7                         | 15,384.3                         | 3125.2                           | 44.5                          | 167.7                          | 269.9                          | 123.6                           |
| CHITA    | F   | JUV/SA | 35                   | 13,034               | 33                      | 12,855                             | 103,598.4                 | 67,184.0                         | 45,085.5                         | 7364.1                           | 65.2                          | 279.5                          | 675.9                          | 203.9                           |
| CT4072   | M   | SA     | 13                   | 1766                 | 4                       | 1035                               | 127,960.6                 | 77,777.8                         | 53,485.7                         | 7047.6                           | 89.6                          | 196.0                          | 853.8                          | 256.7                           |
| CT8654   | M   | JUV    | 4                    | 954                  | 2                       | 854                                | 15,386.6                  | 14,788.3                         | 9290.8                           | 1059.0                           | 53.2                          | 197.7                          | 162.4                          | 138.6                           |
| CT9058   | M   | SA     | 3                    | 520                  | 2                       | 434                                | 8896.8                    | 10,635.0                         | 7389.3                           | 1400.7                           | 60.6                          | 173.1                          | 109.2                          | 166.6                           |
| CT9563   | M   | JUV/SA | 16                   | 2802                 | 8                       | 2306                               | 114,371.6                 | 52,356.2                         | 31,861.0                         | 4588.9                           | 62.7                          | 257.3                          | 896.0                          | 239.1                           |
| DCJ0MT   | F   | SA     | 31                   | 5815                 | 21                      | 4821                               | 62,433.4                  | 45,926.6                         | 31,351.4                         | 5649.2                           | 54.1                          | 209.9                          | 422.2                          | 205.9                           |
| HECTOR   | M   | SA     | 33                   | 4783                 | 12                      | 3857                               | 189,888.8                 | 114,995.2                        | 72,668.1                         | 6749.9                           | 118.7                         | 302.2                          | 1351.5                         | 209.2                           |
| IHWEY8   | F   | SA     | 3                    | 298                  | 1                       | 188                                | 20,962.6                  | 21,621.9                         | 15,073.9                         | 2121.9                           | 47.4                          |                                | 261.6                          | 124.1                           |
| JA5W9H   | M   | SA     | 1                    | 128                  |                         |                                    | 7989.3                    | 10,886.6                         | 7727.4                           | 1758.3                           | 33.6                          | 119.8                          | 193.1                          | 66.3                            |
| N6M1M6   | M   | SA     | 6                    | 1137                 | 5                       | 1057                               | 34,989.3                  | 25,677.1                         | 15,306.6                         | 3066.8                           | 57.8                          | 213.1                          | 493.7                          | 133.3                           |
| NT113CZS | F   | SA     | 2                    | 57                   |                         |                                    | 11,459.2                  | 10,927.4                         | 7557.4                           | 1384.9                           | 26.3                          |                                | 221.8                          | 78.0                            |
| NT12VG3Y | M   | JUV    | 2                    | 160                  |                         |                                    | 6465.0                    | 8768.2                           | 5752.6                           | 1048.1                           | 36.7                          | 94.9                           | 86.0                           | 96.6                            |

**Supplementary Table S2 (continuation):** Description of natural history information and movement parameters of each immature condor tagged with GPS devices. For each individual we report the ID, sex, age, total number of sampled months (N° total month) and total number of GPS locations for the total months (N° total locs.). In addition, we report the number of months that reached more than 140 locations per month (Months + 140 locs.) and were used in the home range analyses, and their respective number of GPS locations to those are reported (N° locs. (month +140 locs.)). Moreover, the home range areas of the maximum flight distances of each marked immature Andean condor are reported. The MCP of 100%, the KDE of 99%, 95% and 50% of the contour area are reported, as well as the maximum distance between two successive locations separated by a time interval of one hour (Max. dist. x hr), and the maximum distance flown in one day (Max. daily dist.), as well as the total latitudinal (North-South) and longitudinal (West - East) distance flown. In grey, the individuals that did not reach the minimum values of GPS locations necessary to be considered in the statistical analyses.

| ID             | Sex | Age    | N° total month | N° total locs. | Month + 140 locs. | N° locs (month +140 locs) | MCP (km <sup>2</sup> ) | KDE 99% (km <sup>2</sup> ) | KDE 95% (km <sup>2</sup> ) | KDE 50% (km <sup>2</sup> ) | Max. dist. x hr (km) | Max. daily dist. (km) | Total lat. dist. (km) | Total long. dist. (km) |
|----------------|-----|--------|----------------|----------------|-------------------|---------------------------|------------------------|----------------------------|----------------------------|----------------------------|----------------------|-----------------------|-----------------------|------------------------|
| O4WOMJ         | F   | SA     | 36             | 6600           | 23                | 5547                      | 70,997.2               | 56,892.0                   | 40,104.6                   | 6713.5                     | 63.8                 | 233.1                 | 656.0                 | 164.1                  |
| PEPO           | M   | SA     | 30             | 5385           | 13                | 4563                      | 141,050.3              | 91,317.6                   | 61,730.5                   | 11,609.0                   | 68.3                 | 274.3                 | 986.4                 | 225.9                  |
| RK2GX6         | F   | SA     | 2              | 242            | 1                 | 216                       | 43,958.7               | 33,094.2                   | 22,856.6                   | 3647.7                     | 43.8                 | 134.5                 | 536.7                 | 110.5                  |
| TOTO           | M   | JUV/SA | 35             | 8858           | 22                | 7381                      | 227,162.4              | 100,520.3                  | 55,572.7                   | 5961.6                     | 110.6                | 270.4                 | 1261.9                | 291.6                  |
| TP1PYG         | F   | JUV    | 2              | 66             |                   |                           | 8092.1                 | 8606.6                     | 5913.9                     | 746.0                      | 32.2                 |                       | 237.3                 | 73.5                   |
| TWFXZJ         | M   | SA     | 3              | 215            |                   |                           | 59,449.6               | 40,211.2                   | 27,884.2                   | 4480.7                     | 42.1                 | 88.4                  | 556.6                 | 145.5                  |
| U0MLYR         | F   | JUV/SA | 19             | 2689           | 8                 | 1953                      | 55,951.8               | 46,456.4                   | 33,812.7                   | 7598.0                     | 52.9                 | 189.7                 | 519.8                 | 145.3                  |
| VFE3F9         | F   | SA     | 1              | 19             |                   |                           | 1206.1                 | 4761.7                     | 3170.4                     | 541.1                      | 47.8                 |                       | 61.9                  | 81.6                   |
| VHE95O         | F   | SA     | 1              | 9              |                   |                           | 613.0                  | 3873.3                     | 2596.1                     | 502.6                      | 24.4                 |                       | 60.0                  | 17.9                   |
| VHSRLQ         | F   | JUV    | 2              | 177            |                   |                           | 11,435.6               | 12,653.5                   | 8791.8                     | 1864.9                     | 35.3                 | 141.3                 | 221.1                 | 81.6                   |
| <b>Total</b>   |     |        | <b>342</b>     | <b>65,190</b>  | <b>181</b>        | <b>54,091</b>             | <b>438,260.0</b>       | <b>206,854.7</b>           | <b>121,812.1</b>           | <b>15,282.9</b>            |                      |                       | <b>1969.7</b>         | <b>385.4</b>           |
| <b>Maximum</b> |     |        |                |                |                   |                           | <b>227,162.4</b>       | <b>114,995.2</b>           | <b>72,668.1</b>            | <b>11,609.0</b>            | <b>118.7</b>         | <b>302.2</b>          | <b>1351.5</b>         | <b>291.6</b>           |

**Supplementary Table S3:** Description of natural history information and movement parameters of each immature condor tagged with GPS devices. For each individual we report the ID, sex, age, and for each season we report the number of months that reached more than 140 locations per month (N° months + 140 locs.) and number of GPS locations for the months that reached more than 140 locations (N° locs. (month + 140 locs.))

| ID        | Sex | Age | Warm season                |                                     | Cold season             |                                    |
|-----------|-----|-----|----------------------------|-------------------------------------|-------------------------|------------------------------------|
|           |     |     | N° month<br>+ 140<br>locs. | N° locs.<br>(month<br>+140<br>locs) | Month<br>+ 140<br>locs. | N° locs<br>(month<br>+140<br>locs) |
| BLANCA    | F   | SA  | 9                          | 2946                                | 7                       | 1909                               |
| BM27B3_a  | M   | SA  | 1                          | 148                                 |                         |                                    |
| BM27B3_b* | F   | JUV | 5                          | 1245                                | 1                       | 213                                |
| BM27B3_b* | F   | SA  | 2                          | 377                                 |                         |                                    |
| BPAZIT    | F   | SA  | 1                          | 186                                 |                         |                                    |
| CHITA*    | F   | JUV | 6                          | 2006                                | 6                       | 2662                               |
| CHITA*    | F   | SA  | 10                         | 3228                                | 11                      | 4959                               |
| CT4072    | M   | SA  | 3                          | 820                                 | 1                       | 215                                |
| CT8654    | M   | JUV | 2                          | 854                                 |                         |                                    |
| CT9058    | M   | SA  | 2                          | 434                                 |                         |                                    |
| CT9563*   | M   | JUV | 4                          | 1239                                | 1                       | 273                                |
| CT9563*   | M   | SA  | 1                          | 340                                 | 2                       | 454                                |
| DCJ0MT    | F   | SA  | 14                         | 3451                                | 7                       | 1370                               |
| HECTOR    | M   | SA  | 8                          | 2697                                | 4                       | 1160                               |
| IHWEY8    | F   | SA  | 1                          | 188                                 |                         |                                    |
| N6M1M6    | M   | SA  | 5                          | 1057                                |                         |                                    |
| O4WOMJ    | F   | SA  | 8                          | 1587                                | 15                      | 3960                               |
| PEPO      | M   | SA  | 5                          | 1424                                | 8                       | 3139                               |
| RK2GX6    | F   | SA  | 1                          | 216                                 |                         |                                    |
| TOTO*     | M   | JUV | 5                          | 2078                                | 4                       | 1054                               |
| TOTO*     | M   | SA  | 9                          | 3132                                | 4                       | 1117                               |
| U0MLYR*   | F   | JUV | 4                          | 1162                                | 2                       | 388                                |
| U0MLYR*   | F   | SA  | 1                          | 187                                 | 1                       | 216                                |

\*same individual at different ages

**Supplementary Table S4:** Linear mixed models that evaluate how home range size –100% Minimum Convex Polygon (MCP) and Kernel Density Estimator (KDE) 99% of the contour area – of immature Andean condor individuals can be affected by age (juvenile or sub-adult), sex and season (warm or cold). The asterisk shows statistically significant results.

| Model              | Variables      | Est.<br>value | Lower  | Upper | Std.<br>Error | t-<br>value | p-<br>value |   |
|--------------------|----------------|---------------|--------|-------|---------------|-------------|-------------|---|
| <b>MCP</b>         | (Intercept)    | 3.845         | 3.660  | 4.029 | 0.094         | 40.755      | 0.000       | * |
|                    | Season(warm)   | 0.325         | 0.231  | 0.418 | 0.048         | 6.784       | 0.000       | * |
|                    | Age(sub-adult) | 0.190         | 0.007  | 0.372 | 0.089         | 2.137       | 0.045       | * |
|                    | Sex(male)      | 0.032         | -0.139 | 0.203 | 0.082         | 0.395       | 0.698       |   |
| <b>KDE<br/>99%</b> | (Intercept)    | 3.971         | 3.860  | 4.083 | 0.057         | 69.487      | 0.000       | * |
|                    | Season(warm)   | 0.204         | 0.145  | 0.263 | 0.030         | 6.716       | 0.000       | * |
|                    | Age(sub-adult) | 0.157         | 0.052  | 0.263 | 0.051         | 3.072       | 0.006       | * |
|                    | Sex(male)      | 0.003         | -0.105 | 0.111 | 0.052         | 0.052       | 0.959       |   |

**Supplementary Figure S1:** Trend throughout the year of home range size for different home range estimators: A) 100% Minimum Convex Polygon and B) the Kernel Density Estimator (KDE) of 99% of the contour area.

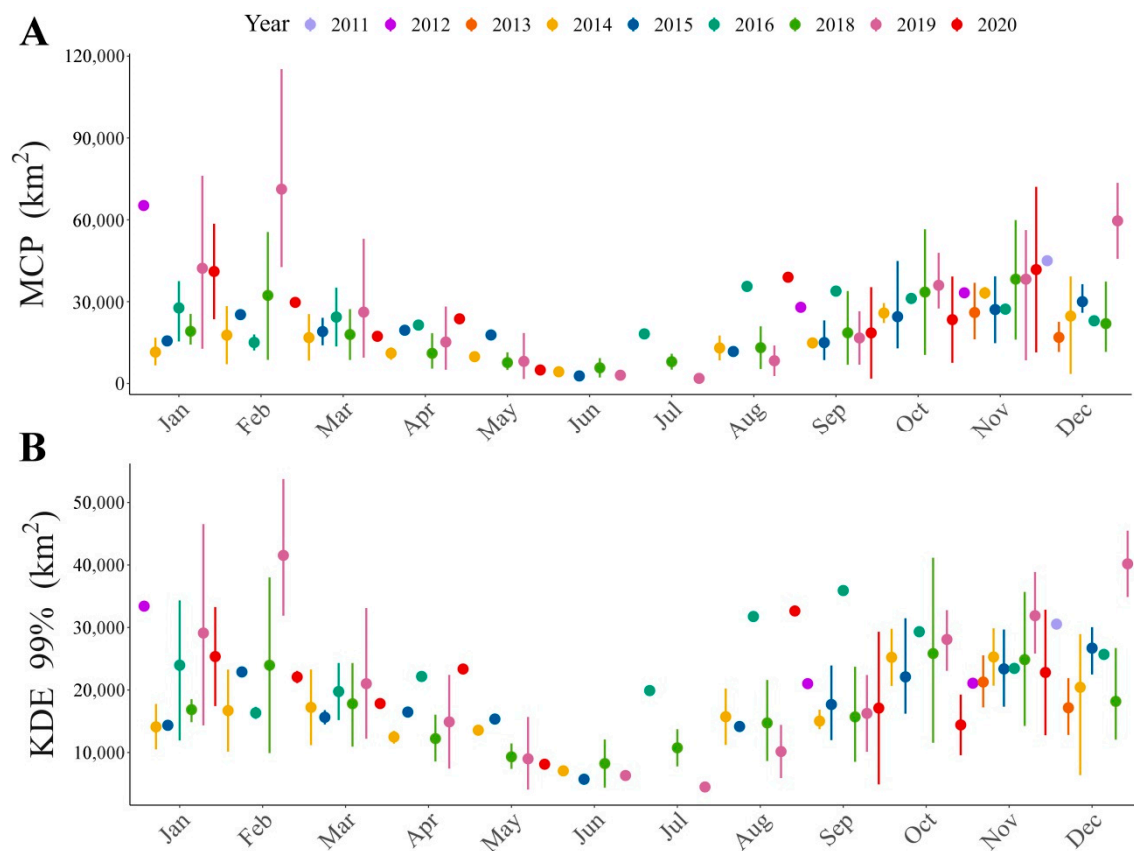

**Supplementary Figure S2:** Differences between sexes and ages by season for the logarithm of the different estimators: A) 100% Minimum Convex Polygon and B) the Kernel Density Estimator (KDE) of 99% of the contour area.

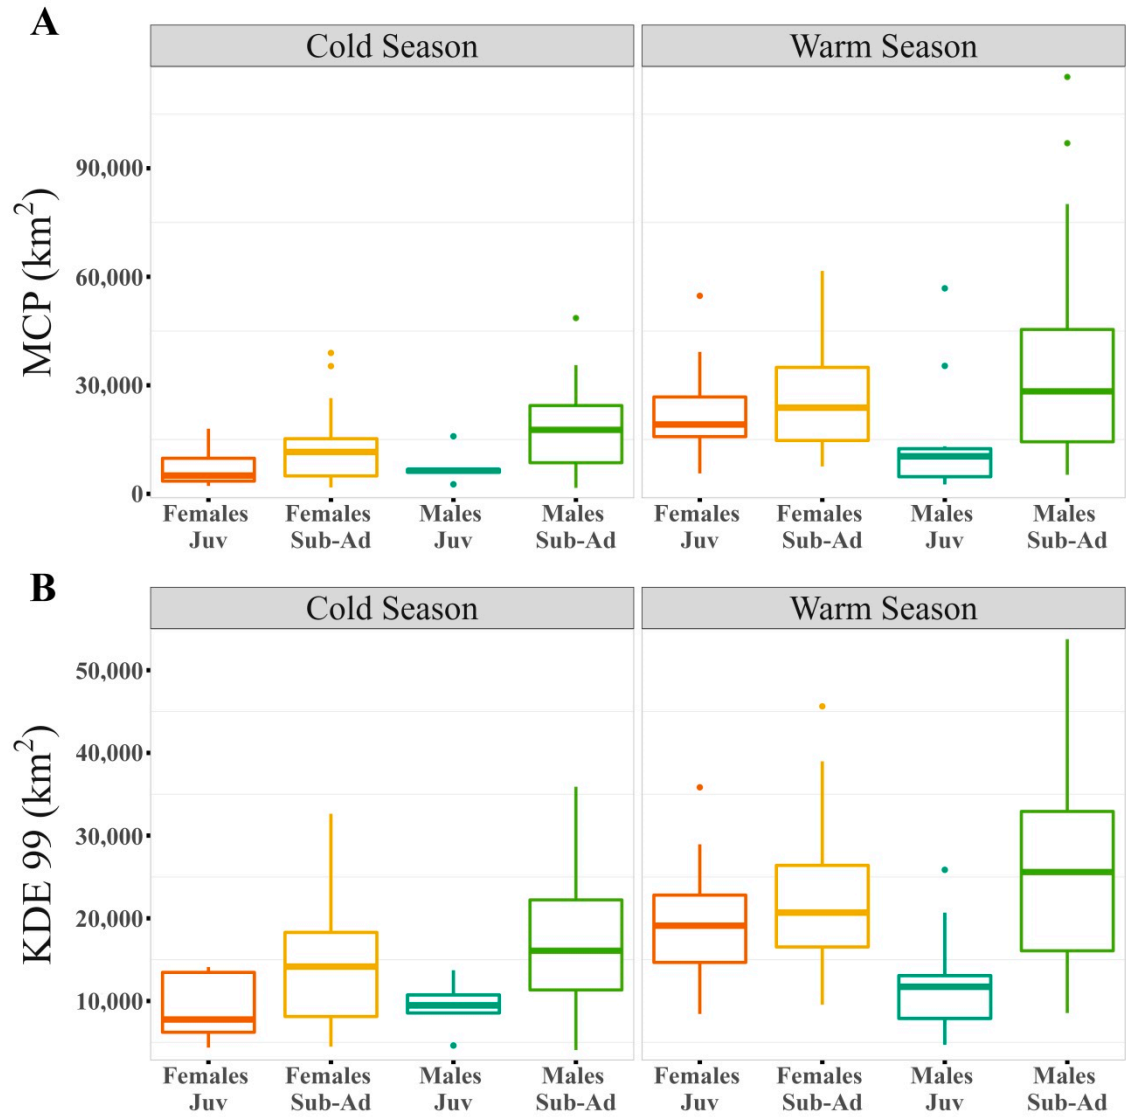

Supplement: s1 [file s1]
